# Supplementary material for: Thermostable succinonitrile-based gel electrolyte for efficient, long-life dye-sensitized solar cells
Source: Royal Society of Chemistry journal article supplement (doi:10.1039/b615915j), 2007-01-01
Supplement: b615915j.pdf [file b615915j.pdf]

## **Thermostable succinonitrile-based gel electrolyte for efficient, long-life dye-sensitized solar cells**

Zhigang Chen, Hong Yang, Xianghong Li, Fuyou Li,\* Tao Yi, Chunhui Huang\*

Department of Chemistry & Laboratory of Advanced Materials, Fudan University,  
Handan Road 220, Shanghai 200433, P. R. China.

Supporting information:

Fig.1 Photos of pure succinonitrile (A), succinonitrile-silica (silica: 7 wt % of succinonitrile) (B) at 60 °C, and succinonitrile-BMI·BF<sub>4</sub>-silica (silica: 7 wt% of succinonitrile-BMI·BF<sub>4</sub>) (C) at 80 °C.

Fig. 3 Photos of electrolyte-A and electrolyte-C at 80 °C, and electrolyte-B at 20 and 45 °C.

Fig. S1 Photos of pure succinonitrile (A), succinonitrile-silica (Silica: 7 wt % of succinonitrile) (B) at 20 °C.

Fig. S2 Photo of succinonitrile-BMI·BF<sub>4</sub> (1 mL BMI·BF<sub>4</sub> + 3.0 g succinonitrile) at 20 °C

Fig. S3 Photos of the mixtures of succinonitrile-BMI·BF<sub>4</sub>-silica (silica: 3-9 wt% of succinonitrile-BMI·BF<sub>4</sub>) at 20 °C.

Fig. S4 Photo of BMI·BF<sub>4</sub> -silica (silica: 3 wt% of BMI·BF<sub>4</sub>) at 20 °C.

---

\* To whom correspondence should be addressed. Email: [fyli@fudan.edu.cn](mailto:fyli@fudan.edu.cn) (F.Y. Li);  
[chhuang@pku.edu.cn](mailto:chhuang@pku.edu.cn) (C.H. Huang)  
Fax: +86-21-55664621

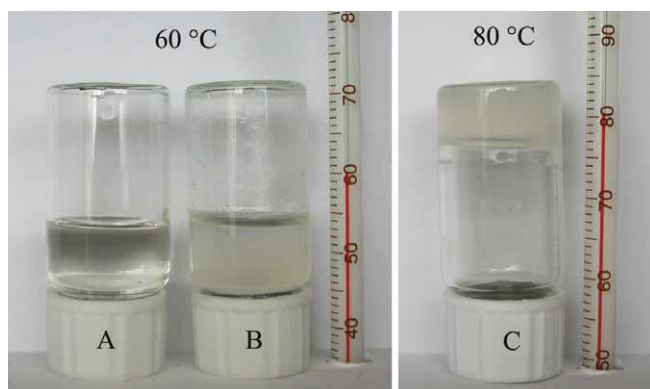

Fig.1 Photos of pure succinonitrile (A), succinonitrile-silica (silica: 7 wt % of succinonitrile) (B) at 60 °C, and succinonitrile-BMI·BF<sub>4</sub>-silica (silica: 7 wt% of succinonitrile-BMI·BF<sub>4</sub>) (C) at 80 °C.

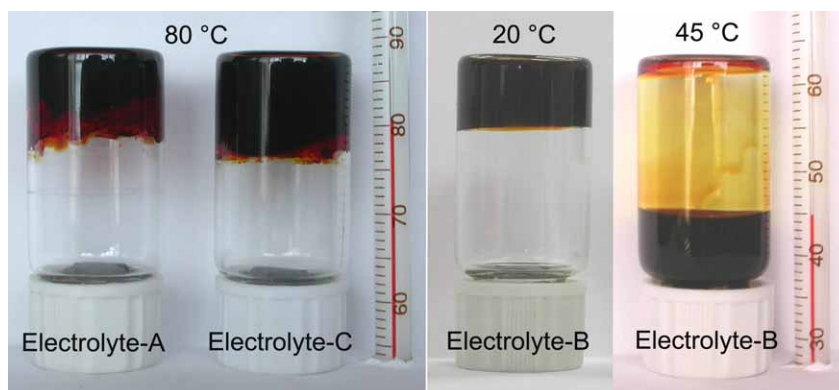

Fig. 3 Photos of electrolyte-A and electrolyte-C at 80 °C, and electrolyte-B at 20 and 45 °C.

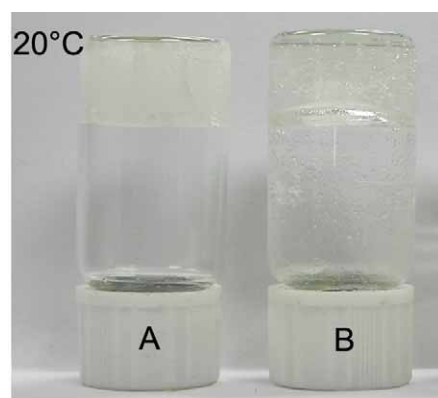

Fig. S1 Photos of pure succinonitrile (A), succinonitrile-silica (silica: 7 wt % of succinonitrile) (B) at 20 °C.

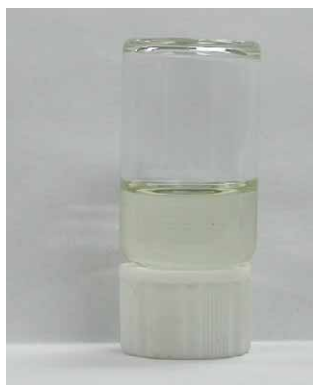

Fig. S2 Photo of succinonitrile-BMI·BF<sub>4</sub> (1 mL BMI·BF<sub>4</sub> + 3.0 g succinonitrile) at 20 °C

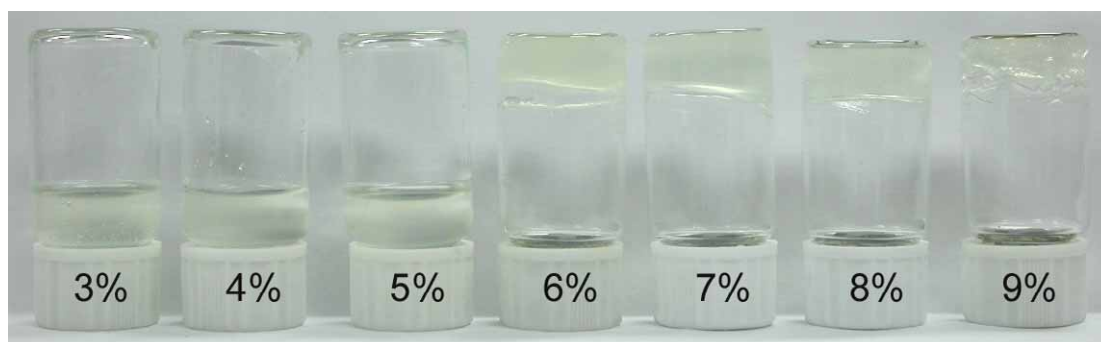

Fig. S3 Photos of the mixtures of succinonitrile-BMI·BF<sub>4</sub>-silica (silica: 3-9 wt% of succinonitrile-BMI·BF<sub>4</sub>) at 20 °C.

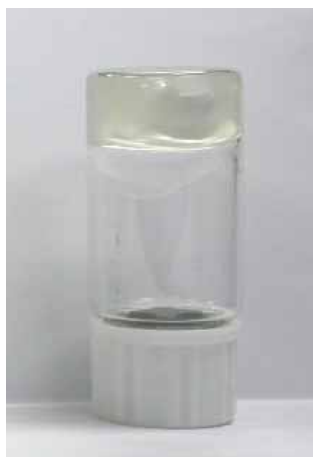

Fig. S4 Photo of BMI·BF<sub>4</sub>-silica (silica: 3 wt% of BMI·BF<sub>4</sub>) at 20 °C.
